# Supplementary material for: Enhanced Bioactivity of Tailor-Made Glycolipid Enriched Manuka Honey
Source: MDPI journal article supplement (doi:10.3390/ijms231912031), 2022-10-10
Supplement: s1 [file s1]

**Table S1.** Stress assay reading at 20 hours displaying bioactivity of MH, MHWE, GOH, GDH, GLH and GMH at 0, 0.1, 0.2, 0.4, 0.8, 1.2 and 1.6 % (v/v). Fluorescence signals are normalized to the OD<sub>600</sub> of the biosensor giving specific signals for each type of stress.

| Mixture | Concentration % (v/v) | OD <sub>600</sub> | RFP/OD <sub>600</sub> | BFP/OD <sub>600</sub> | GFP/OD <sub>600</sub> |
|---------|-----------------------|-------------------|-----------------------|-----------------------|-----------------------|
| Control | 0                     | 1.01 ± 0.04       | 108 ± 3               | 1474 ± 223            | 694 ± 87              |
| MH      | 0.1                   | 1.02 ± 0.01       | 109 ± 12              | 1352 ± 65             | 239 ± 26              |
|         | 0.2                   | 0.74 ± 0.04       | 96 ± 20               | 1309 ± 55             | 234 ± 9               |
|         | 0.4                   | 0.74 ± 0.04       | 74 ± 11               | 1287 ± 36             | 233 ± 8               |
|         | 0.8                   | 0.76 ± 0.02       | 65 ± 13               | 1328 ± 33             | 185 ± 8               |
|         | 1.2                   | 0.78 ± 0.02       | 69 ± 14               | 1361 ± 37             | 190 ± 10              |
|         | 1.6                   | 0.77 ± 0.02       | 79 ± 6                | 1499 ± 40             | 202 ± 4               |
| MHWE    | 0.1                   | 1.03 ± 0.04       | 102 ± 18              | 1614 ± 155            | 279 ± 37              |
|         | 0.2                   | 0.85 ± 0.11       | 89 ± 9                | 1448 ± 80             | 180 ± 7               |
|         | 0.4                   | 0.84 ± 0.10       | 89 ± 7                | 1447 ± 50             | 173 ± 5               |
|         | 0.8                   | 0.82 ± 0.11       | 74 ± 8                | 1770 ± 129            | 148 ± 7               |
|         | 1.2                   | 0.84 ± 0.07       | 78 ± 8                | 1683 ± 83             | 149 ± 4               |
|         | 1.6                   | 0.87 ± 0.08       | 79 ± 9                | 1721 ± 101            | 147 ± 8               |
| GOH     | 0.1                   | 0.81 ± 0.04       | 126 ± 11              | 1449 ± 76             | 265 ± 17              |
|         | 0.2                   | 0.78 ± 0.09       | 121 ± 22              | 1169 ± 19             | 216 ± 5               |
|         | 0.4                   | 0.64 ± 0.02       | 127 ± 14              | 1360 ± 26             | 242 ± 7               |
|         | 0.8                   | 0.60 ± 0.02       | 220 ± 15              | 1578 ± 11             | 303 ± 4               |
|         | 1.2                   | 0.69 ± 0.02       | 582 ± 47              | 1855 ± 95             | 313 ± 11              |
|         | 1.6                   | 0.66 ± 0.08       | 589 ± 28              | 2512 ± 51             | 500 ± 38              |
| GDH     | 0.1                   | 1.00 ± 0.02       | 79 ± 13               | 1429 ± 129            | 284 ± 27              |
|         | 0.2                   | 0.93 ± 0.03       | 91 ± 21               | 1425 ± 187            | 176 ± 4               |
|         | 0.4                   | 0.80 ± 0.03       | 79 ± 7                | 1398 ± 109            | 160 ± 6               |
|         | 0.8                   | 0.85 ± 0.08       | 80 ± 13               | 1674 ± 359            | 158 ± 5               |
|         | 1.2                   | 1.10 ± 0.07       | 76 ± 18               | 1507 ± 380            | 132 ± 6               |
|         | 1.6                   | 1.19 ± 0.04       | 75 ± 13               | 1269 ± 187            | 123 ± 5               |
| GLH     | 0.1                   | 1.04 ± 0.01       | 206 ± 10              | 1335 ± 34             | 283 ± 31              |
|         | 0.2                   | 1.01 ± 0.03       | 178 ± 16              | 1331 ± 61             | 168 ± 13              |
|         | 0.4                   | 0.81 ± 0.01       | 83 ± 5                | 1174 ± 46             | 185 ± 5               |
|         | 0.8                   | 1.00 ± 0.02       | 99 ± 9                | 1054 ± 20             | 132 ± 2               |
|         | 1.2                   | 1.07 ± 0.03       | 99 ± 9                | 1064 ± 42             | 126 ± 8               |
|         | 1.6                   | 1.11 ± 0.02       | 106 ± 7               | 1101 ± 37             | 127 ± 5               |
| GMH     | 0.1                   | 1.17 ± 0.03       | 142 ± 39              | 1806 ± 247            | 337 ± 100             |
|         | 0.2                   | 0.78 ± 0.02       | 146 ± 20              | 1739 ± 29             | 219 ± 4               |
|         | 0.4                   | 0.72 ± 0.03       | 140 ± 27              | 1803 ± 78             | 227 ± 6               |
|         | 0.8                   | 0.80 ± 0.05       | 103 ± 9               | 1623 ± 91             | 189 ± 5               |
|         | 1.2                   | 0.84 ± 0.05       | 123 ± 29              | 1791 ± 149            | 196 ± 7               |
|         | 1.6                   | 0.91 ± 0.08       | 157 ± 24              | 1887 ± 268            | 201 ± 7               |
